# Supplementary material
Source: MDPI journal article supplement (https://www.mdpi.com/2072-4292/12/3/580)
Supplement: s1 [file s1]

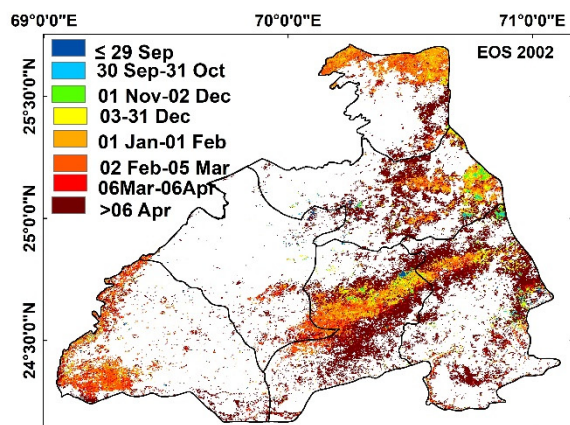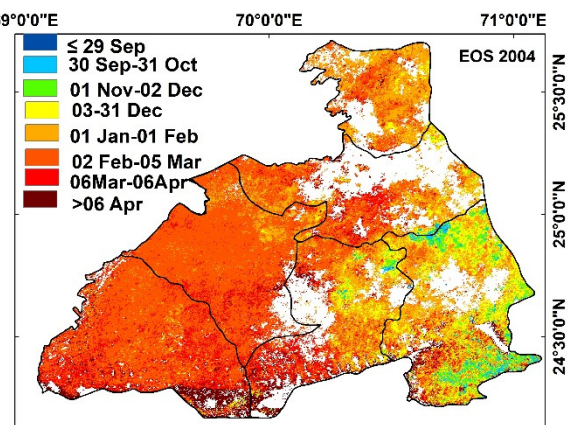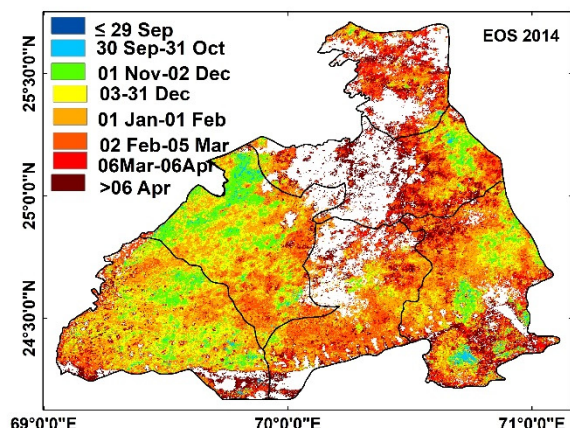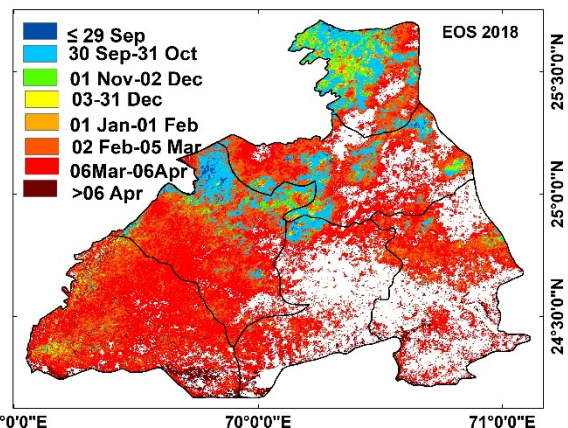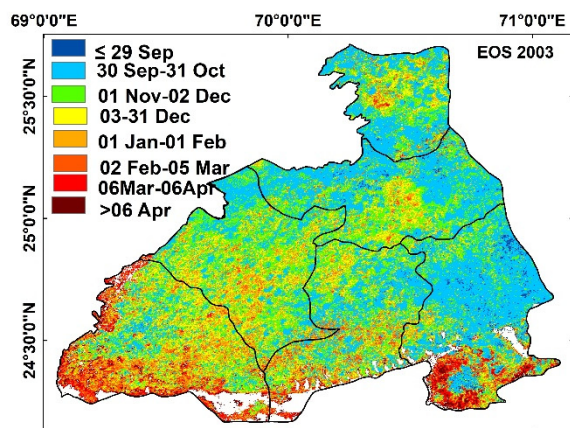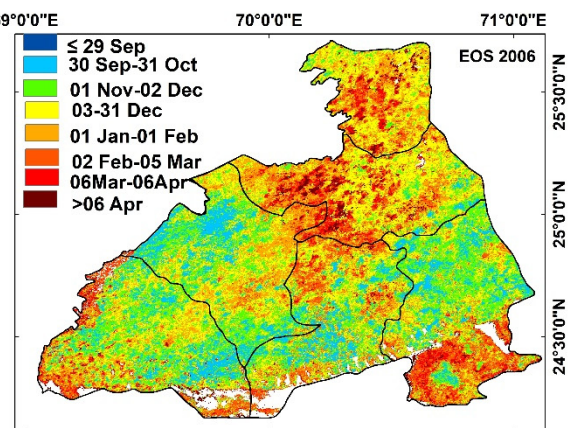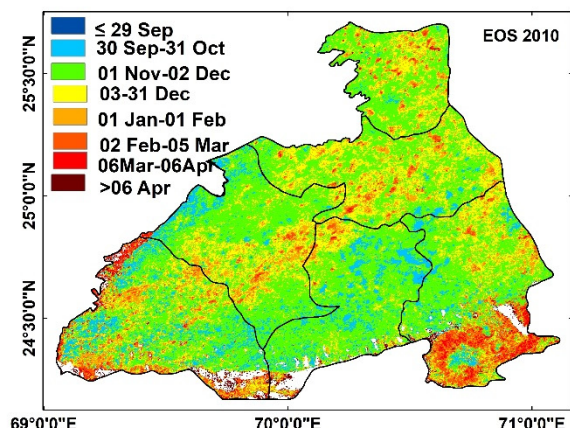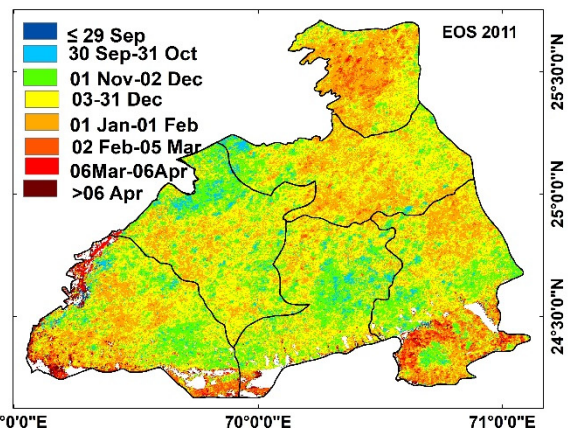

Figure S1. End of Season (EOS) for four dry years (2002, 2004, 2014, 2018), and four wet years (2003, 2006, 2010, 2011), derived from TIMESAT using NDVI thresholds of 35% for SOS and 10% for EOS from base of seasonal NDVI curve. EOS is incorrectly shown as March-April for most areas in dry years and for many areas in wet years, whereas the growing season normally ends in October to November of the previous year.
